# Supplementary material for: Antithrombotic Management and Long-Term Outcomes of Patients with Atrial Fibrillation. Insights from CRAFT Trial
Source: MDPI journal article supplement (doi:10.3390/jcm10081780), 2021-04-19
Supplement: s1 [file s1]

## Supplementary material online

**Figure S1.** Kaplan-Meier analysis of time-to-events (left side) and subgroup-specific hazard ratios with 95% confidence intervals for events (right side) in patients treated with dabigatran vs rivaroxaban (upper panel) dabigatran vs VKA (middle panel) rivaroxaban vs VKA (lower panel) after propensity score matching.

### A) All-cause death

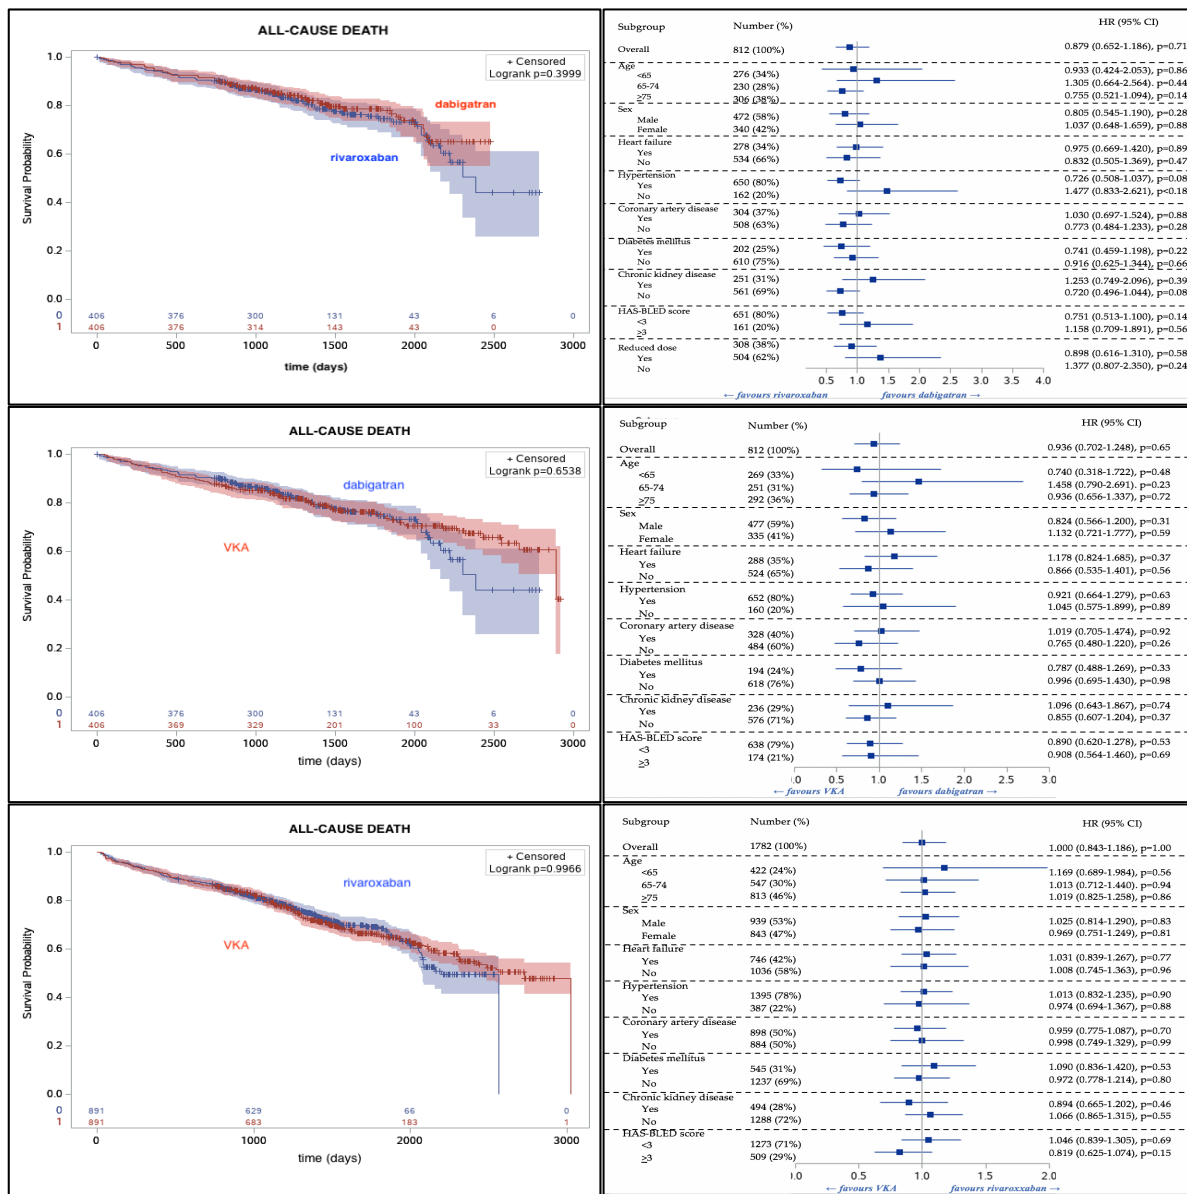

**Abbreviations:** VKA, vitamin K antagonist

b) thromboembolic events

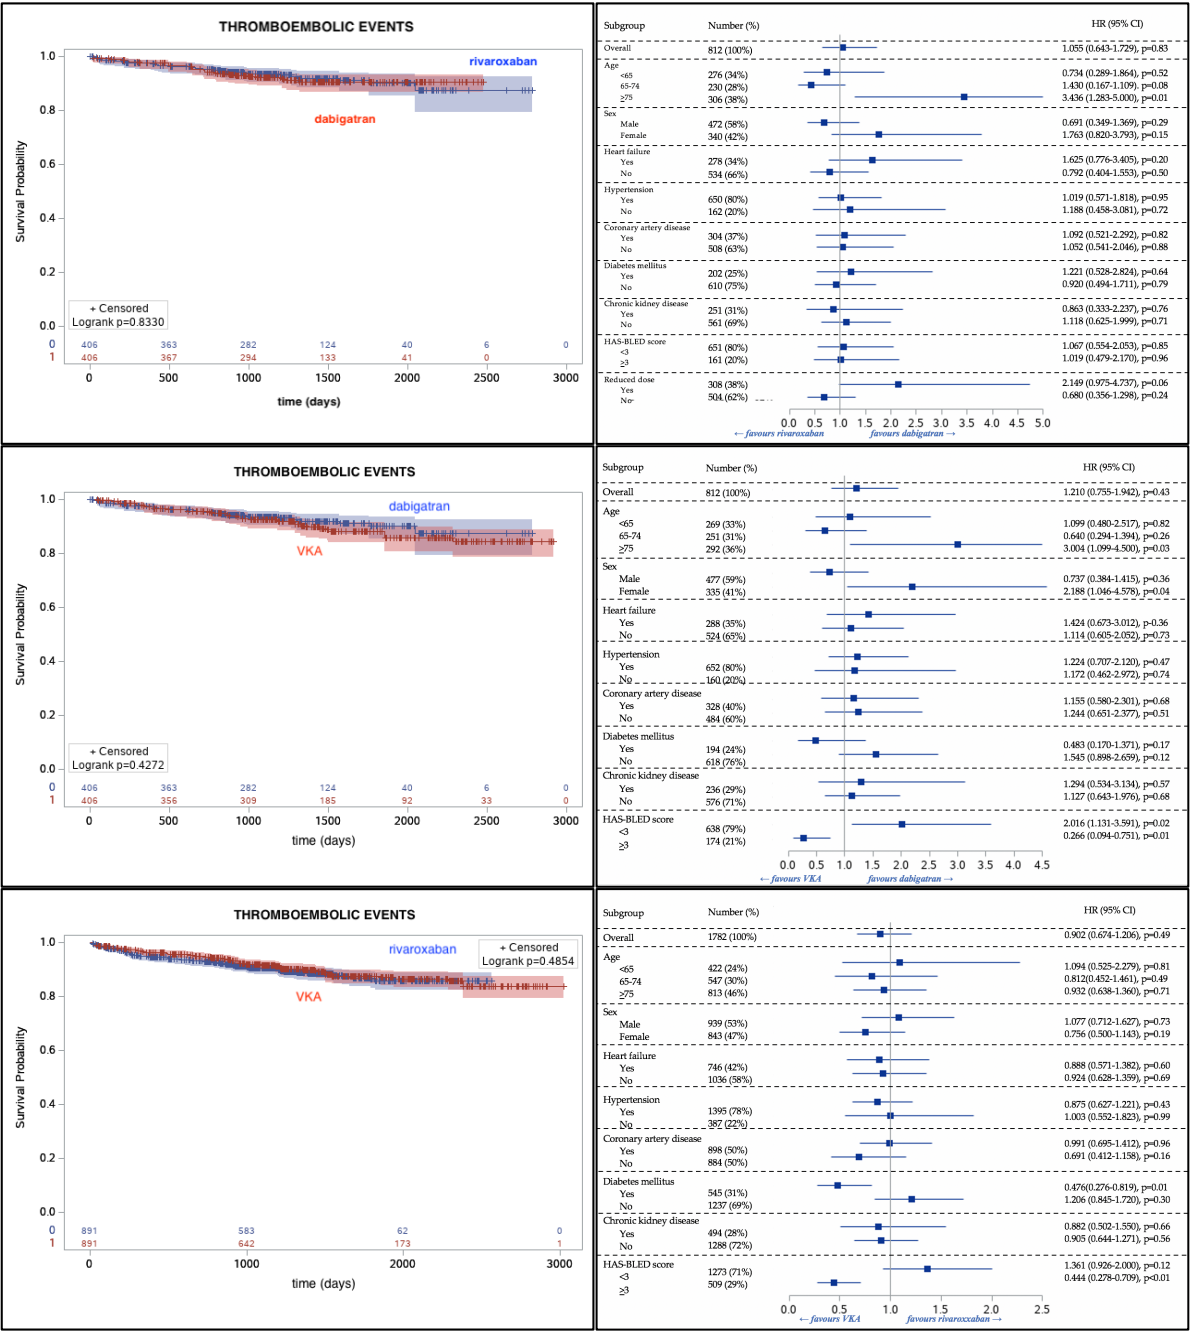

Abbreviations: VKA, vitamin K antagonist

c) hemorrhagic events

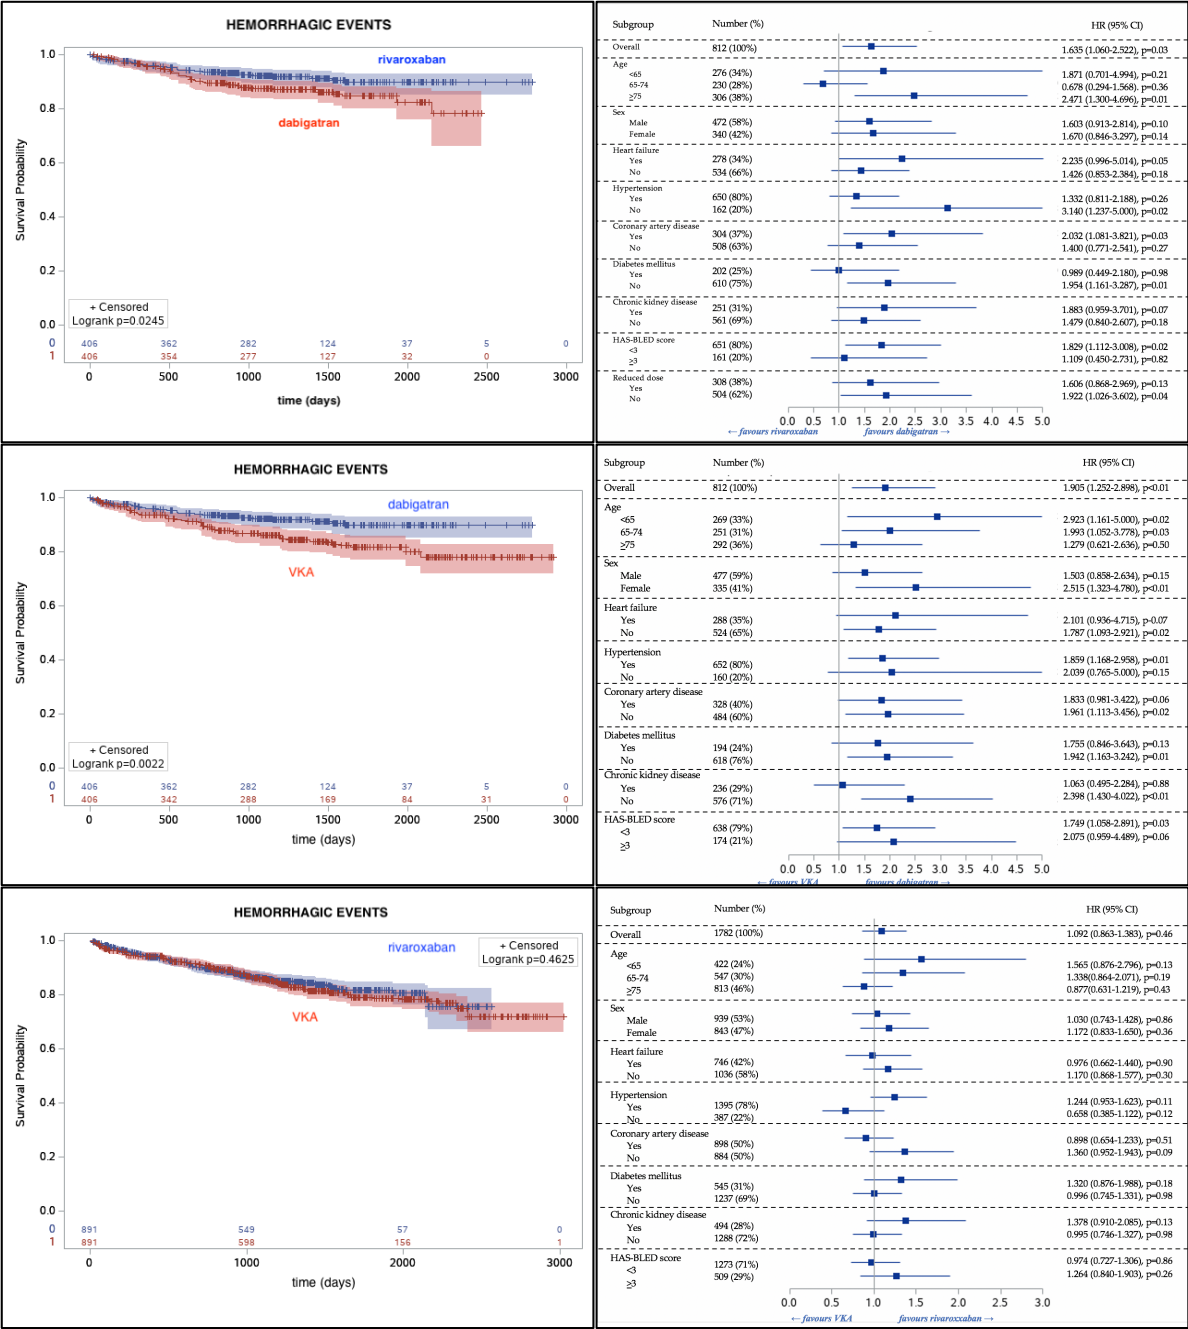

Abbreviations: VKA, vitamin K antagonist

**Figure S2.** Thromboembolic and bleeding risk scores and their predictive value.

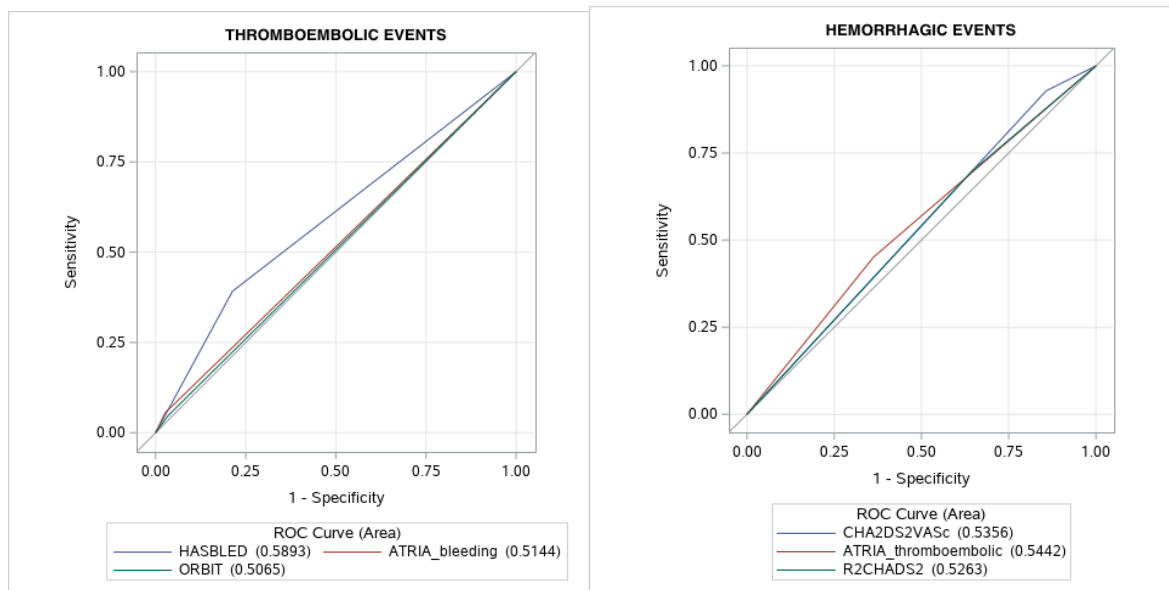

**Table S1.** Analyzed ICD-10 codes

|                        |                                                                                                                                                                                                                                                                                                                                                                                                                                                                                                                                                                                                                                                                                                                                                                                                                                                                                                                                                                                                      |
|------------------------|------------------------------------------------------------------------------------------------------------------------------------------------------------------------------------------------------------------------------------------------------------------------------------------------------------------------------------------------------------------------------------------------------------------------------------------------------------------------------------------------------------------------------------------------------------------------------------------------------------------------------------------------------------------------------------------------------------------------------------------------------------------------------------------------------------------------------------------------------------------------------------------------------------------------------------------------------------------------------------------------------|
| <b>Ischemic events</b> | I63, I74.2, I74.3, I74.4, I74.5, I74.8, I74.9, I74, I65, I63.0, I63.1, I63.2, I63.3, I63.4, I63.5, I63.8, I63.9, I67.8, I67.9, I64, I74.0, I74.1 K55.0, M31.1, N28.0, H34.1, G45.8, G45.9, G45,                                                                                                                                                                                                                                                                                                                                                                                                                                                                                                                                                                                                                                                                                                                                                                                                      |
| <b>Bleeding events</b> | I85.0, I84.4, I98.3, K22.1, K25.4, K26.4, K27.0, K29.0, K29.7, K31.8, K92.0, K57.3, K57.9, K62.5, K92.1, K92.2, K25.0, K25.2, K25.6, K26.0, K26.2, K26.6, K27.2, K27.4, K27.6, K28.0, K28.2, K28.4, K28.6, K29.2, K29.3, K29.4, K29.5, K29.6, K29.8, K55.2, K57.0, K57.1, K57.2, K57.4, K57.5, K57.8, K22.6, K66.1, K76.2, K62.6, K63.3, I62.0, I62.9, I60, I60.0, I60.1, I60.2, I60.3, I60.4, I60.5, I60.6, I60.7, I60.8, I60.9, I61, I61.0, I61.1, I61.2, I61.3, I61.4, I61.5, I61.6, I61.8, I61.9, I62.1, I62, S06.4, S06.5, S06.6, D62, D68.3, D69.8, D69.9, H05.2, H11.3, H21.0, H31.3, H31.4, H35.6, H43.1, H44.8, H45.0, H47.0, H92.2, I23.0, I31.2, I71.3, J94.2, M25.0, M79.8, N02, N02.0, N02.1, N02.2, N02.3, N02.4, N02.5, N02.6, N02.7, N02.8, N02.9, N42.1, N42.1, N83.7, N85.7, N89.7, N92.0, N92.1, N92.3, N92.4, N92.5, N93, N93.0, N93.8, N93.9, N95.0, O71.7, R04, R04.0, R04.1, R04.2, R04.8, R04.89, R04.9, R23.3, R31, R31.0, R31.9, R58, R58, S26.0, S27.1, T79.2, T81.0, Y60 |

**Table S2.** Comparison of rivaroxaban and dabigatran treatment groups after propensity score matching.

| Variable                                | Rivaroxaban<br>(n=406) | Dabigatran<br>(n=406)  | p<br>value |
|-----------------------------------------|------------------------|------------------------|------------|
| Demographics                            |                        |                        |            |
| Age (years)                             | 70 [61-79]             | 69 [62-78]             | 0.35       |
| Females                                 | 174 (43%)              | 166 (41%)              | 0.62       |
| Atrial fibrillation type                |                        |                        |            |
| Paroxysmal                              | 219 (54%)              | 208 (51%)              | 0.48       |
| Non-paroxysmal                          | 187 (46%)              | 198 (49%)              |            |
| Comorbidities                           |                        |                        |            |
| Heart failure                           | 129 (32%)              | 149 (37%)              | 0.16       |
| Hypertension                            | 324 (80%)              | 326 (80%)              | 0.93       |
| Coronary artery disease                 | 144 (35%)              | 160 (39%)              | 0.28       |
| Diabetes mellitus                       | 108 (27%)              | 94 (23%)               | 0.29       |
| Ischemic stroke/TIA/<br>thromboembolism | 56 (14%)               | 58 (14%)               | 0.92       |
| Haemorrhagic events                     | 31 (7.6%)              | 30 (7.4%)              | 1.00       |
| COPD                                    | 21 (5.2%)              | 28 (6.9%)              | 0.38       |
| Smoking                                 | 29 (7.2%)              | 32 (7.9%)              | 0.79       |
| Laboratory parameters                   |                        |                        |            |
| eGFR ≤14 ml/min/1.73m2                  | 0 (0%) <i>n=346</i>    | 0 (0%) <i>n=353</i>    | 1.00       |
| eGFR 15-29 ml/min/1.73m2                | 4 (1.2%) <i>n=346</i>  | 3 (0.8%) <i>n=353</i>  | 1.00       |
| eGFR 30-49 ml/min/1.73m2                | 64 (18%) <i>n=346</i>  | 67 (19%) <i>n=353</i>  | 0.85       |
| eGFR ≥50 ml/min/1.73m2                  | 278 (80%) <i>n=346</i> | 283 (80%) <i>n=353</i> | 1.00       |

*Number provided after in italic indicates the total number of patients available for that variable.*

**Abbreviations:** COPD, chronic obstructive pulmonary disease; eGFR, estimated glomerular filtration rate; TIA, transient ischemic attack

**Table S3.** Comparison of vitamin K antagonist and dabigatran treatment groups after propensity score matching.

| Variable                                 | VKA<br>(n=406)         | Dabigatran<br>(n=406)  | p<br>value |
|------------------------------------------|------------------------|------------------------|------------|
| <b>Demographics</b>                      |                        |                        |            |
| Age (years)                              | 69 [62-78]             | 69 [62-78]             | 0.88       |
| Females                                  | 169 (42%)              | 166 (41%)              | 0.89       |
| <b>Atrial fibrillation type</b>          |                        |                        |            |
| Paroxysmal                               | 221 (54%)              | 208 (51%)              | 0.40       |
| Non-paroxysmal                           | 185 (46%)              | 198 (49%)              | 0.40       |
| <b>Comorbidities</b>                     |                        |                        |            |
| Heart failure                            | 139 (32%)              | 149 (37%)              | 0.51       |
| Hypertension                             | 326 (80%)              | 326 (80%)              | 1.00       |
| Coronary artery disease                  | 168 (41%)              | 160 (39%)              | 0.62       |
| Diabetes mellitus                        | 100 (25%)              | 94 (23%)               | 0.68       |
| Ischemic stroke/TIA/<br>thromboembolism  | 45 (11%)               | 58 (14.3%)             | 0.21       |
| Haemorrhagic events                      | 21 (5.2%)              | 30 (7.4%)              | 0.25       |
| COPD                                     | 31 (7.6%)              | 28 (6.9%)              | 0.79       |
| Smoking                                  | 30 (7.4%)              | 32 (7.9%)              | 0.90       |
| <b>Laboratory parameters</b>             |                        |                        |            |
| eGFR $\leq$ 14 ml/min/1.73m <sup>2</sup> | 0 (0%) <i>n=358</i>    | 0 (0%) <i>n=353</i>    | 1.00       |
| eGFR 15-29 ml/min/1.73m <sup>2</sup>     | 6 (1.7%) <i>n=358</i>  | 3 (0.7%) <i>n=353</i>  | 0.51       |
| eGFR 30-49 ml/min/1.73m <sup>2</sup>     | 59 (16%) <i>n=358</i>  | 67 (19%) <i>n=353</i>  | 0.50       |
| eGFR $\geq$ 50 ml/min/1.73m <sup>2</sup> | 293 (82%) <i>n=358</i> | 283 (80%) <i>n=353</i> | 0.49       |

*Number provided after in italic indicates the total number of patients available for that variable.*

**Abbreviations:** COPD, chronic obstructive pulmonary disease; eGFR, estimated glomerular filtration rate; TIA, transient ischemic attack; VKA, vitamin K antagonist

**Table S4.** Comparison of rivaroxaban and vitamin K antagonist treatment groups after propensity score matching.

| Variable                                 | Rivaroxaban<br>(n=891) | VKA<br>(n=891)         | p<br>value |
|------------------------------------------|------------------------|------------------------|------------|
| <b>Demographics</b>                      |                        |                        |            |
| Age (years)                              | 74 [65-81]             | 72 [65-80]             | 0.08       |
| Females                                  | 420 (47%)              | 423 (47%)              | 0.92       |
| <b>Atrial fibrillation type</b>          |                        |                        |            |
| Paroxysmal                               | 467 (52%)              | 463 (52%)              | 0.89       |
| Non-paroxysmal                           | 424 (48%)              | 428 (48%)              | 0.89       |
| <b>Comorbidities</b>                     |                        |                        |            |
| Heart failure                            | 381 (43%)              | 365 (41%)              | 0.47       |
| Hypertension                             | 689 (77%)              | 706 (79%)              | 0.36       |
| Coronary artery disease                  | 447 (50%)              | 451 (51%)              | 0.89       |
| Diabetes mellitus                        | 274 (31%)              | 271 (30%)              | 0.92       |
| Ischemic stroke/TIA/<br>thromboembolism  | 157 (18%)              | 166 (19%)              | 0.63       |
| Haemorrhagic events                      | 98 (11%)               | 83 (9.3%)              | 0.27       |
| COPD                                     | 114 (13%)              | 101 (11%)              | 0.38       |
| Smoking                                  | 57 (6.4%)              | 55 (6.2%)              | 0.92       |
| <b>Laboratory parameters</b>             |                        |                        |            |
| eGFR $\leq$ 14 ml/min/1.73m <sup>2</sup> | 3 (0.4%) <i>n=831</i>  | 1 (0.1%) <i>n=829</i>  | 0.62       |
| eGFR 15-29 ml/min/1.73m <sup>2</sup>     | 18 (2.2%) <i>n=831</i> | 14 (1.7%) <i>n=829</i> | 0.59       |
| eGFR 30-49 ml/min/1.73m <sup>2</sup>     | 178 (21%) <i>n=831</i> | 158 (19%) <i>n=829</i> | 0.25       |
| eGFR $\geq$ 50 ml/min/1.73m <sup>2</sup> | 632 (76%) <i>n=831</i> | 656 (79%) <i>n=829</i> | 0.22       |

*Number provided after in italic indicates the total number of patients available for that variable.*

**Abbreviations:** COPD, chronic obstructive pulmonary disease; eGFR, estimated glomerular filtration rate; TIA, transient ischemic attack; VKA, vitamin K antagonist



**Table S5.** Distribution of direct oral anticoagulants according the recommendation for patients receiving reduced (A) and standard (B) dosing.

| <b>A. Reduced doses of direct oral anticoagulants</b>                       |                               |                                |
|-----------------------------------------------------------------------------|-------------------------------|--------------------------------|
| <b>Variable</b>                                                             | <b>Dabigatran<br/>(n=177)</b> | <b>Rivaroxaban<br/>(n=379)</b> |
| <b>Correct prescription</b>                                                 |                               |                                |
| <b>All</b>                                                                  | <b>116 (66%)</b>              | <b>250 (66%)</b>               |
| <b>Recommended indications for dose reduction</b>                           |                               |                                |
| - eGFR 30-49ml/min/1.73m <sup>2</sup>                                       | 101 (57%)                     | 163 (43%)                      |
| - eGFR 15-49ml/min/1.73m <sup>2</sup>                                       | 24 (13%)                      | Not applicable                 |
| - Age $\geq$ 80 years                                                       | Not applicable                | 163 (43%)                      |
| - eGFR 30-49ml/min/1.73m <sup>2</sup> + age $\geq$ 80 years                 | 51 (29%)                      | Not applicable                 |
| <b>Indications to be considered (<math>\geq</math> 2 below indications)</b> | 26 (15%)                      | Not applicable                 |
|                                                                             | 15 (8.5%)                     | 87 (23%)                       |
| <b>Incorrect prescription</b>                                               |                               |                                |
| <b>All</b>                                                                  | <b>52 (29%)</b>               | <b>122 (32%)</b>               |
| <b>Unknown reason</b>                                                       | 28 (16%)                      | 25 (6.6%)                      |
| <b>Indications to be considered</b>                                         | 24 (13%)                      | 97 (26%)                       |
| - HAS-BLED $\geq$ 3                                                         | 2 (1.1%)                      | 5 (1.3%)                       |
| - Age $\geq$ 75 years                                                       | 17 (9.6%)                     | 83 (22%)                       |
| - NSAIDs and/or APT drugs                                                   | 2 (1.1%)                      | 7 (1.8%)                       |
| - Amiodarone                                                                | 3 (1.7%)                      | 2 (0.5%)                       |
| <b>Unknown appropriate prescriptions</b>                                    |                               |                                |
| <b>No data regarding CrCl or type of DHP-CCB</b>                            | <b>9 (5.1%)</b>               | <b>7 (1.8%)</b>                |

| <b>B. Standard doses of direct oral anticoagulants</b> |                               |                                |
|--------------------------------------------------------|-------------------------------|--------------------------------|
| <b>Variable</b>                                        | <b>Dabigatran<br/>(n=224)</b> | <b>Rivaroxaban<br/>(n=502)</b> |
| <b>Incorrect prescription</b>                          |                               |                                |
| <b>Recommended indications for dose reduction</b>      | <b>26 (12%)</b>               | <b>35 (7.0%)</b>               |
| - eGFR 30-49ml/min/1.73m <sup>2</sup>                  | 16 (7.1%)                     | Not applicable                 |
| - eGFR 15-49ml/min/1.73m <sup>2</sup>                  | Not applicable                | 35 (7.0%)                      |
| - Age ≥ 80 years                                       | 8 (3.6%)                      | Not applicable                 |
| - eGFR 30-49ml/min +age ≥ 80 years                     | 2 (0.9%)                      | Not applicable                 |
| <b>Correct prescription</b>                            |                               |                                |
| <b>All</b>                                             | <b>153 (68%)</b>              | <b>415 (83%)</b>               |
| <b>Unknown appropriate prescriptions</b>               |                               |                                |
| <b>No data regarding eGFR or type of DHP-CCB</b>       | <b>45 (20%)</b>               | <b>52 (10%)</b>                |

**Abbreviations:** DHP-CCB – dihydropyridine calcium canal blockers, eGFR, estimated glomerular filtration rate; NSAID - nonsteroidal anti-inflammatory drugs

**Table S6.** Analysis of time-to-major adverse events, all-cause death, thromboembolic and hemorrhagic events for patients treated with appropriate and inappropriate reduced and/or standard NOAC doses.

|                              | Major adverse event    | All-cause death                      | Thromboembolic events  | Haemorrhagic events    |
|------------------------------|------------------------|--------------------------------------|------------------------|------------------------|
|                              | HR [95% CI]            | HR [95% CI]                          | HR [95% CI]            | HR [95% CI]            |
| Dabigatran (n=401)           |                        |                                      |                        |                        |
| Incorrect dose               | 1.140<br>(0.733-1.772) | 1.023<br>(0.600-1.744)               | 1.450<br>(0.619-3.398) | 1.175<br>(0.510-2.708) |
| Correct dose                 | reference              | reference                            | reference              | reference              |
| Dabigatran reduced (n=177)   |                        |                                      |                        |                        |
| Incorrect dose               | 0.644<br>(0.382-1.087) | 0.552<br>(0.302-1.012)               | 1.540<br>(0.434-5.459) | 0.591<br>(0.196-1.782) |
| Correct dose                 | reference              | reference                            | reference              | reference              |
| Dabigatran standard (n=224)  |                        |                                      |                        |                        |
| Incorrect dose               | 1.715<br>(0.743-3.957) | 1.674<br>(0.531-5.272)               | 1.742<br>(0.506-5.999) | 2.393<br>(0.666-8.459) |
| Correct dose                 | reference              | reference                            | reference              | reference              |
| Rivaroxaban (n=881)          |                        |                                      |                        |                        |
| Incorrect dose               | 1.250<br>(0.969-1.613) | <b>1.624</b><br><b>(1.209-2.181)</b> | 0.964<br>(0.554-1.675) | 0.922<br>(0.572-1.486) |
| Correct dose                 | reference              | reference                            | reference              | reference              |
| Rivaroxaban reduced (n=379)  |                        |                                      |                        |                        |
| Incorrect dose               | 0.769<br>(0.567-1.043) | 0.809<br>(0.573-1.143)               | 0.592<br>(0.301-1.164) | NA                     |
| Correct dose                 | reference              | reference                            | reference              | reference              |
| Rivaroxaban standard (n=502) |                        |                                      |                        |                        |
| Incorrect dose               | 1.576<br>(0.927-2.681) | <b>2.754</b><br><b>(1.497-5.068)</b> | 1.502<br>(0.537-4.195) | 0.832<br>(0.280-2.658) |
| Correct dose                 | reference              | reference                            | reference              | reference              |
| NOAC (n=1282)                |                        |                                      |                        |                        |
| Incorrect dose               | 1.211                  | <b>1.429</b>                         | 1.068                  | 0.956                  |

|                       |                                      |                                    |                        |                        |
|-----------------------|--------------------------------------|------------------------------------|------------------------|------------------------|
|                       | (0.971-1.510)                        | <b>(1.104-1.848)</b>               | (0.673-1.696)          | (0.633-1.446)          |
| Correct dose          | reference                            | reference                          | reference              | reference              |
| NOAC reduced (n=556)  |                                      |                                    |                        |                        |
| Incorrect dose        | <b>0.744</b><br><b>(0.572-0.967)</b> | <b>0.739</b><br><b>(0.549-996)</b> | 0.740<br>(0.410-1.335) | 0.644<br>(0.393-1.053) |
| Correct dose          | reference                            | reference                          | reference              | reference              |
| NOAC standard (n=726) |                                      |                                    |                        |                        |
| Incorrect dose        | 1.515<br>(0.971-2.364)               | 2.212<br>(1.293-3.783)             | 1.571<br>(0.716-3.447) | 1.211<br>(0.971-1.510) |
| Correct dose          | reference                            | reference                          | reference              | reference              |

**Abbreviations:** CI, coincidence interval; NOAC, non-vitamin K oral anticoagulant; HR, hazard ratio
